# Supplementary material
Source: publisher figshare collection journal article supplement (https://osapublishing.figshare.com/ndownloader/files/27824961)
Supplement: Supplementary file 1 [file 27824961]

# Small and large scale plasmonically enhanced luminescent solar concentrator for photovoltaic applications: modelling, optimisation and sensitivity analysis: supplement

**MEHRAN RAFIEE,<sup>1,\*</sup>  SUBHASH CHANDRA,<sup>1</sup> HIND AHMED,<sup>1</sup> KEITH BARNHAM,<sup>2</sup> AND SARAH J. MCCORMACK<sup>1</sup>**

<sup>1</sup>*Department of Civil, Structural and Environmental Engineering, Trinity College Dublin, Dublin, Ireland*

<sup>2</sup>*Faculty of Natural Sciences, Department of Physics, Imperial College London, London SW7 2AZ, UK*

\*[rafieem@tcd.ie](mailto:rafieem@tcd.ie)

---

This supplement published with The Optical Society on 30 April 2021 by The Authors under the terms of the [Creative Commons Attribution 4.0 License](#) in the format provided by the authors and unedited. Further distribution of this work must maintain attribution to the author(s) and the published article's title, journal citation, and DOI.

Supplement DOI: <https://doi.org/10.6084/m9.figshare.14378990>

Parent Article DOI: <https://doi.org/10.1364/OE.418183>

# Small and Large Scale Plasmonically Enhanced Luminescent Solar Concentrator for Photovoltaic Applications: Modelling, Optimisation and Sensitivity Analysis: supplement1

Table S1: The nomenclature used in the model

| Nomenclature         |                                                               | Unit |
|----------------------|---------------------------------------------------------------|------|
| $Dim$                | Dimension                                                     |      |
| $di$                 | Distance (spacing between MNP and luminescent molecule)       | m    |
| $e_p$                | Dipole moment                                                 |      |
| $E$                  | Electric field intensity                                      | V/m  |
| $E_i$                | Intensity of incident electric field                          | V/m  |
| $G_g$                | Geometric gain                                                |      |
| $L$                  | Length                                                        | m    |
| $N_{edg}$            | Number of photons reaching the edge of the pLSC               |      |
| $N_{inc}$            | Number of photons incident on top of the pLSC                 |      |
| $P_{T.abs}^L$        | Total power absorbed by the luminescent material              | W    |
| $P_{abs}^L(\lambda)$ | Power absorbed by the luminescent material in each wavelength | W    |
| $P_{atte}$           | Attenuation loss power                                        | W    |
| $P_{cone}$           | Escape cone loss power                                        | W    |
| $P_{direct}$         | Power reaching PV directly                                    | W    |
| $P_{emit}(\lambda)$  | Power emitted by luminescent material in each wavelength      | W    |
| $P_{T.emit}$         | Total power emitted by luminescent material                   | W    |

|                        |                                                                                                              |                                  |
|------------------------|--------------------------------------------------------------------------------------------------------------|----------------------------------|
| $P_{in}(\lambda)$      | Flux (power) density of the incident light                                                                   | $\text{W.m}^{-2}.\text{nm}^{-1}$ |
| $P_{lost}(\lambda)$    | Power lost due to loss mechanisms including the reabsorption, escape cone, attenuation and scattering losses | W                                |
| $P_{out}(\lambda)$     | Power reached to the PV cell                                                                                 | W                                |
| $P_{reflect}(\lambda)$ | Reflected power                                                                                              | W                                |
| $P_{refract}(\lambda)$ | Refracted power                                                                                              | W                                |
| $P_{re-abs}(\lambda)$  | Reabsorbing loss                                                                                             | W                                |
| $P_{SPR}(\lambda)$     | SPR power                                                                                                    | W                                |
| $P_{scat}$             | Scattering loss                                                                                              | W                                |
| $P_{trans}$            | Transmitted power                                                                                            | W                                |
| $P_{trap}$             | Trapped power                                                                                                | W                                |
| $PR$                   | Probability or weighted probability of an event                                                              |                                  |
| $PR_{abs}^L$           | Probability of absorbance by luminescent material                                                            |                                  |
| $PR_{abs}^{MNP}$       | Probability of absorbance by MNP                                                                             |                                  |
| $PR_{atte}$            | Probability of attenuation                                                                                   |                                  |
| $PR_{emit}$            | Weighted probability from emission spectrum                                                                  |                                  |
| $PR_{PDEF}$            | Probability of enhancement due to PDEF                                                                       |                                  |
| $PR_{QF}$              | Probability of quenching                                                                                     |                                  |
| $PR_{QY}$              | Probability of emission (from QY)                                                                            |                                  |
| $PR_r$                 | Probability of reflection                                                                                    |                                  |
| $PR_{re-abs}$          | Probability of reabsorption                                                                                  |                                  |
| $PR_{scat}$            | Probability of scattering                                                                                    |                                  |
| $PR_{T,abs}^L$         | Luminescent material total absorbance probability                                                            |                                  |
| W                      | Width                                                                                                        | m                                |
| $\Gamma_{nr}$          | Non-radiative decay rate                                                                                     | $\text{s}^{-1}$                  |
| $\Gamma_r$             | Radiative decay rate                                                                                         | $\text{s}^{-1}$                  |
| $\Gamma_{rM}$          | Radiative decay rate due to the MNP presence                                                                 | $\text{s}^{-1}$                  |
| $\eta$                 | Refraction index of the medium                                                                               |                                  |
| $\eta_0$               | Efficiency of bare PV cell                                                                                   |                                  |

|                                |                             |        |
|--------------------------------|-----------------------------|--------|
| $\theta_c$                     | Critical angle              | Degree |
| $\theta_i$                     | Angle of incident direction | Degree |
| $\lambda$                      | Wavelength                  | m      |
| $\tau_0$                       | Lifetime                    | s      |
| $\Psi(e_p, x_d, \lambda_{ex})$ | Excitation rate             |        |

Table S2: The acronym used in the model

| Acronym | Detail                                                |
|---------|-------------------------------------------------------|
| ABC     | absorbing boundary condition                          |
| Ag NP   | silver nano particles                                 |
| Au NS   | gold nano spheres                                     |
| Au NS-c | doping concentration of Au NS                         |
| BIPV    | building integrated photovoltaic                      |
| C       | solar concentration ratio                             |
| ECE     | energy conversion efficiency                          |
| FDTD    | finite difference time domain                         |
| FFT     | fast fourier transform                                |
| LSC     | luminescent solar concentrator                        |
| MCRT    | Monte Carlo ray tracing                               |
| MNP     | metal nano particle                                   |
| OCE     | optical conversion efficiency                         |
| pLSC    | plasmonically-enhanced luminescent solar concentrator |
| PBC     | periodic boundary conditions                          |
| PCE     | power conversion efficiency                           |
| PDEF    | photon density enhancement factor                     |

---

|                     |                                                             |
|---------------------|-------------------------------------------------------------|
| PML                 | perfectly matched layer                                     |
| PV                  | photovoltaic                                                |
| SPR                 | surface plasmon resonance                                   |
| TIR                 | total internal reflection                                   |
| QD                  | quantum dots                                                |
| QD-c                | doping concentration of QD                                  |
| QY                  | quantum yield (emission efficiency of luminescent molecule) |
| QY <sub>total</sub> | emission efficiency of the coupled MNP-luminescent molecule |

---

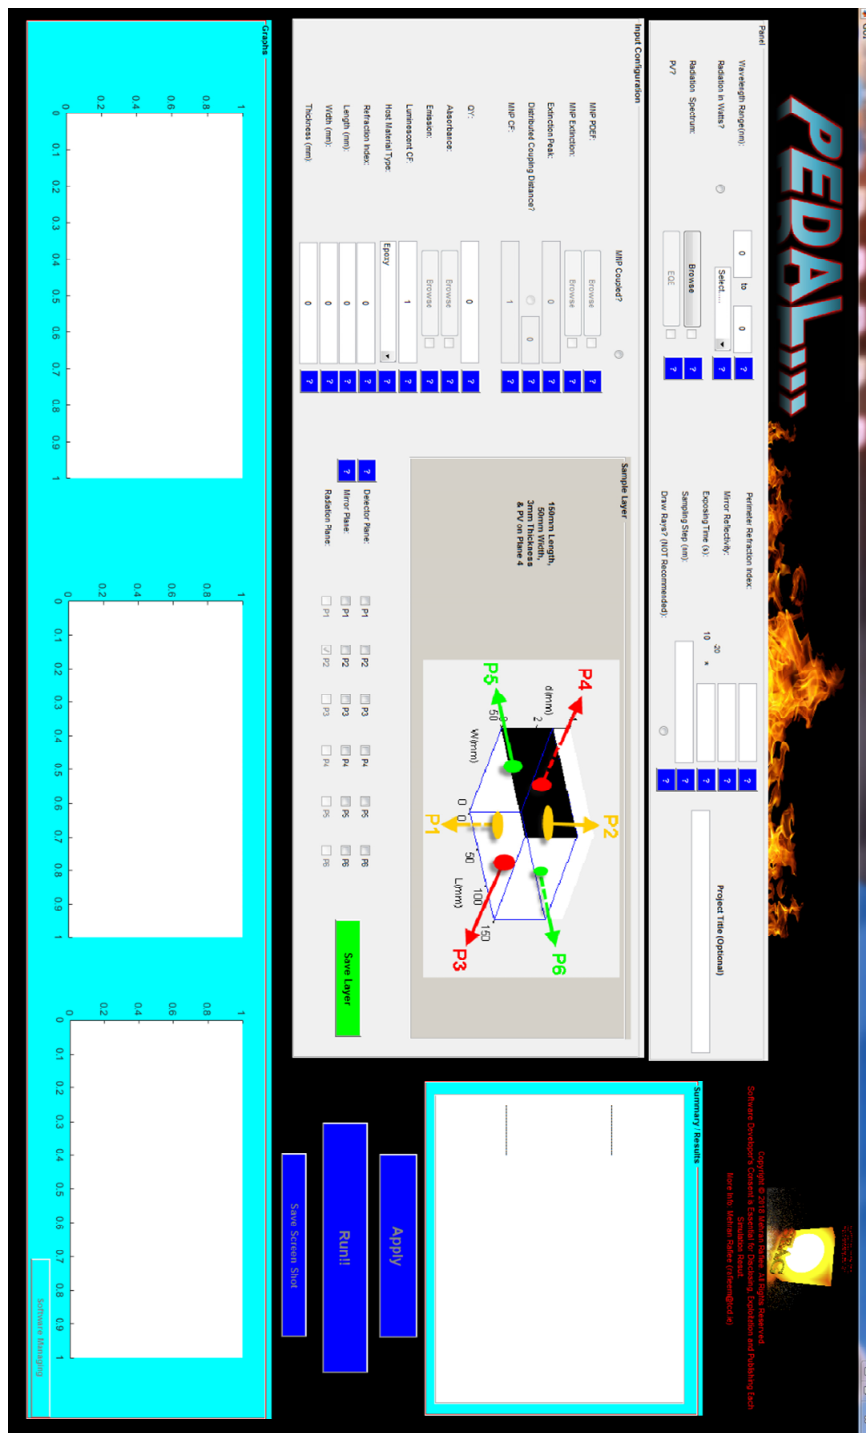

Fig. S1. Developed GUI for the 3D FDTD-MCRT model where the user is able to customize and simulate the pLSC of interest. Note: The GUI has been also designed for modelling other (single and multi-layer) luminescent solar devices including LSC as well as traditional and plasmonically enhanced luminescent down-shifting (LDS and pLDS) devices
